# Supplementary material
Source: PubMed Central journal article supplement (PMC2586381)

Fig. S1. Cheung et al., 2008

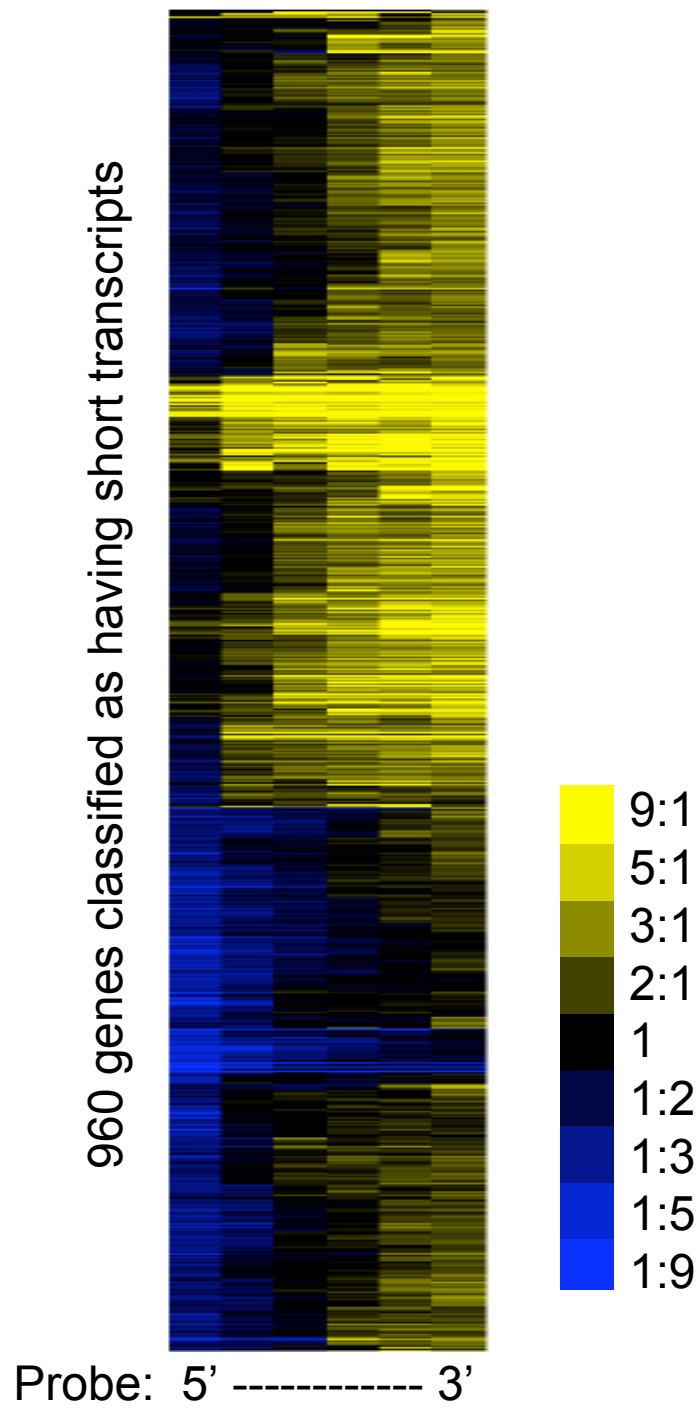

Supplement: pbio.0060277.sg001.pdf [file pbio.0060277.sg001.pdf]

Fig. S2. Cheung et al., 2008

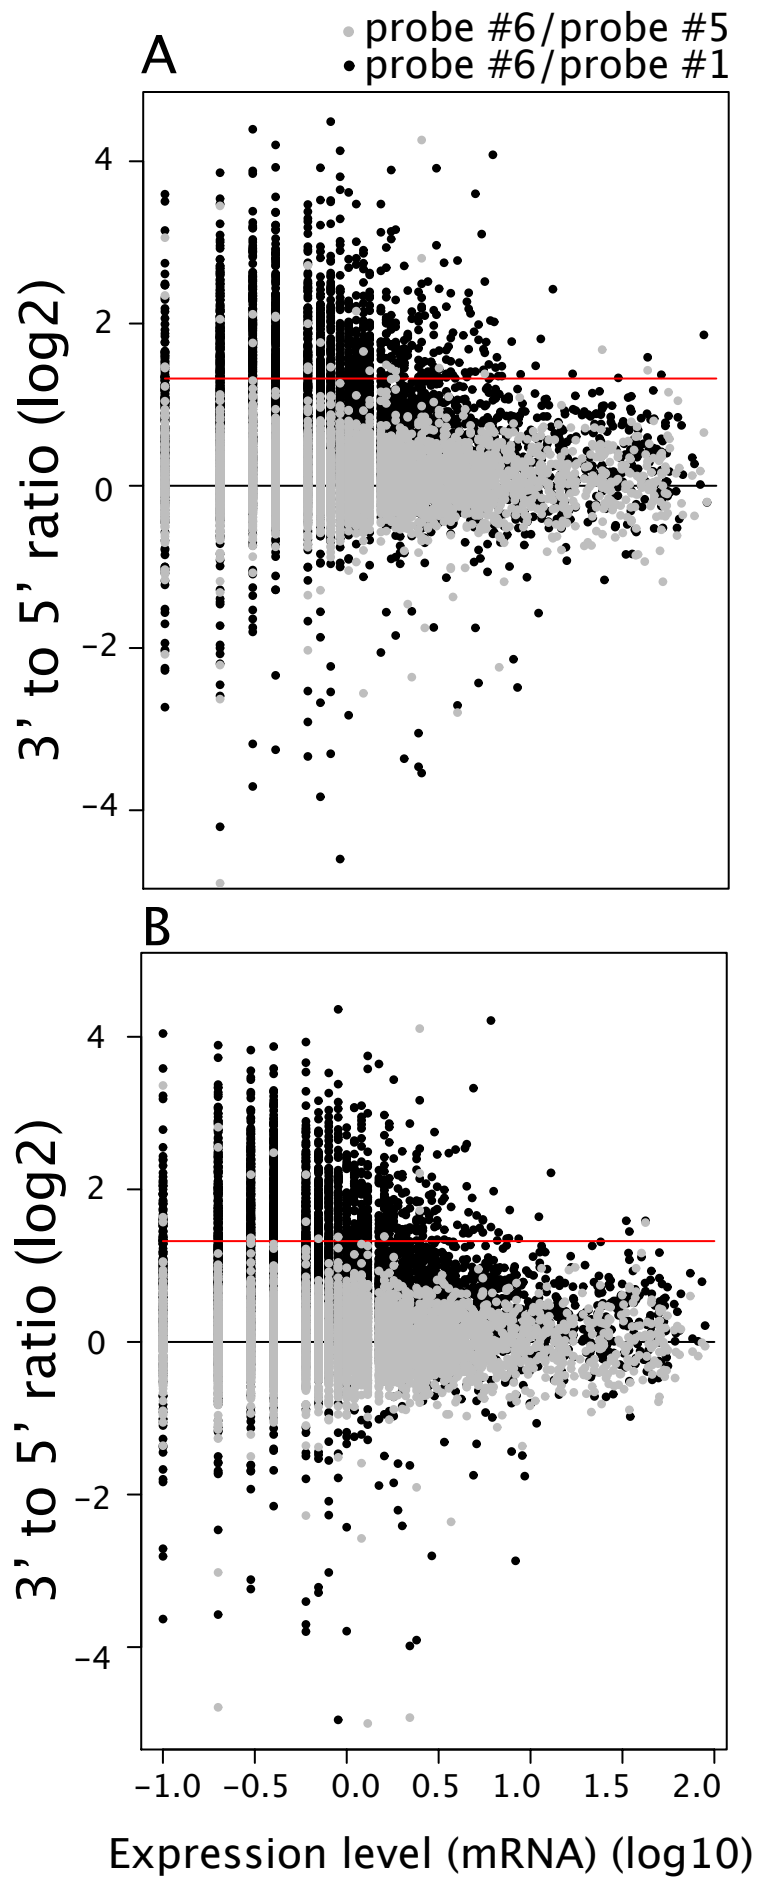

Supplement: pbio.0060277.sg002.pdf [file pbio.0060277.sg002.pdf]

Fig. S3. Cheung et al. 2008

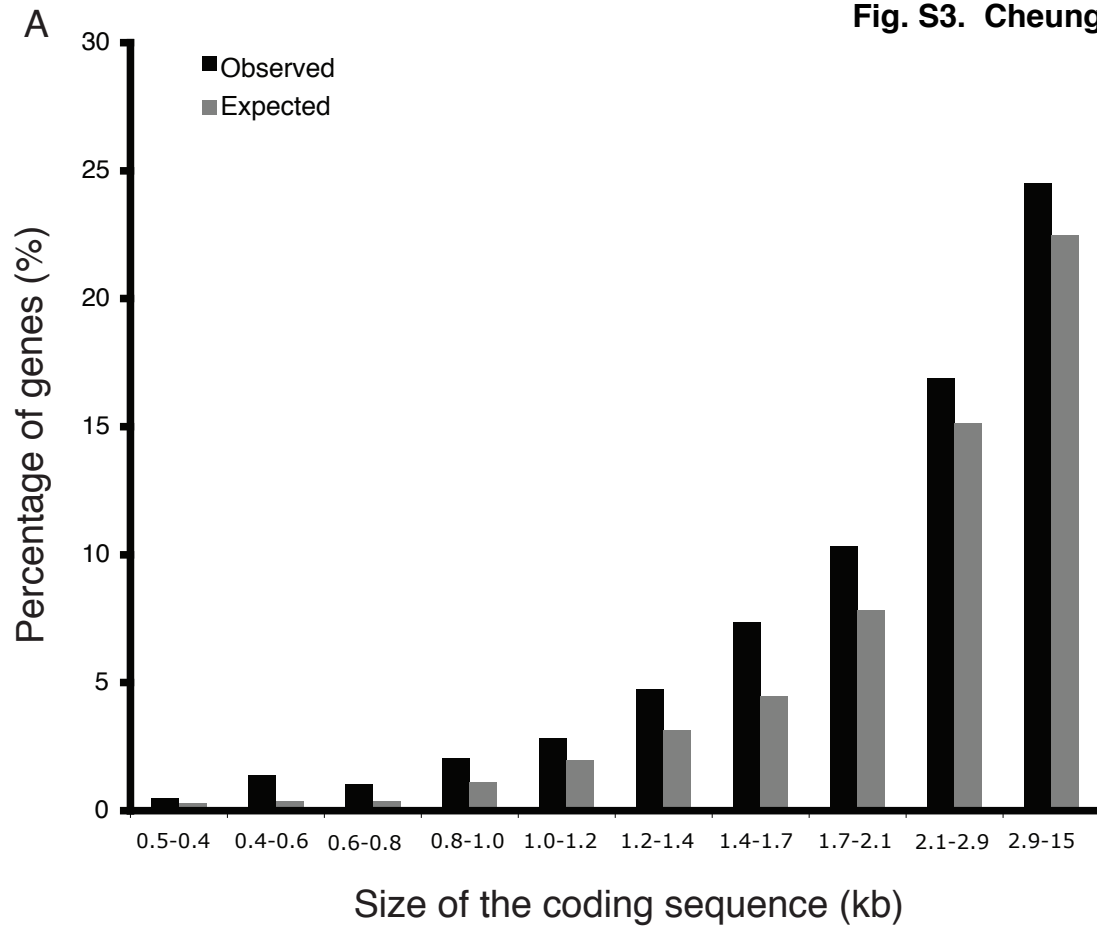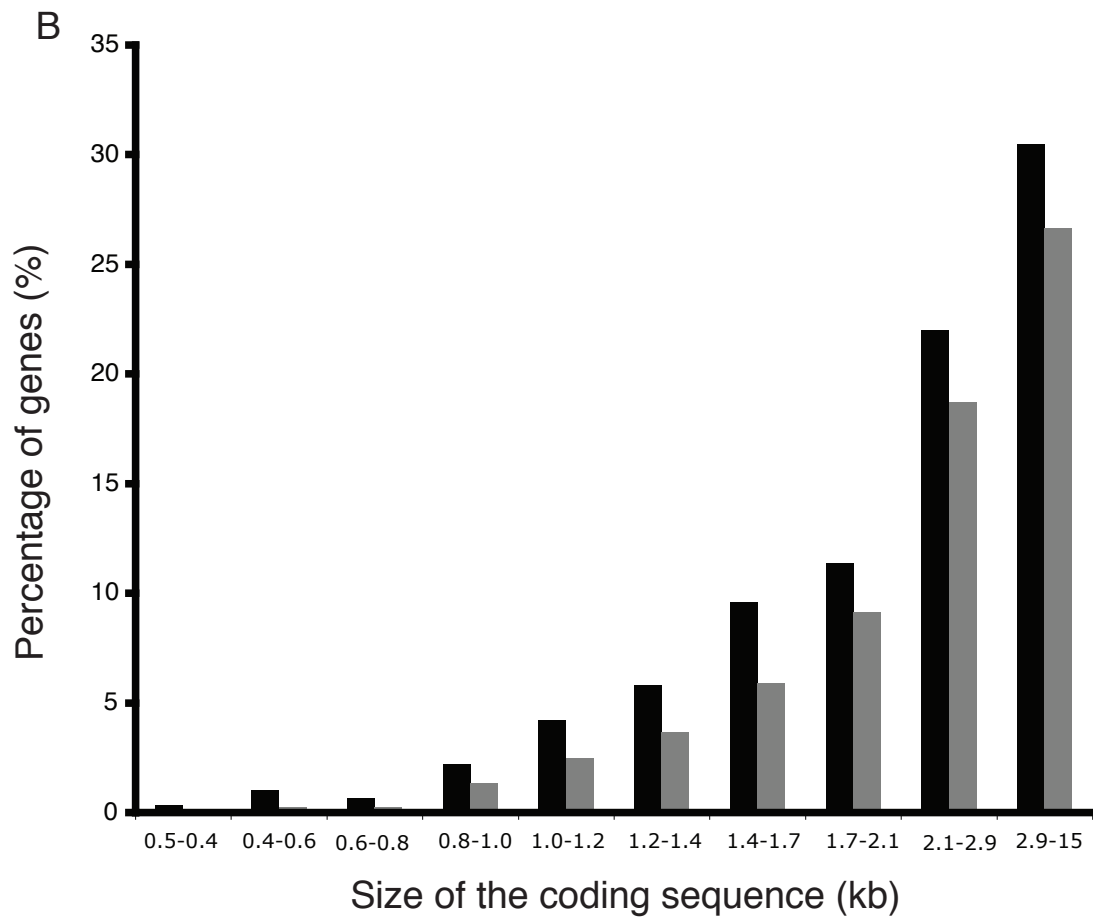

Supplement: pbio.0060277.sg003.pdf [file pbio.0060277.sg003.pdf]

**Fig. S4. Cheung et al., 2008**

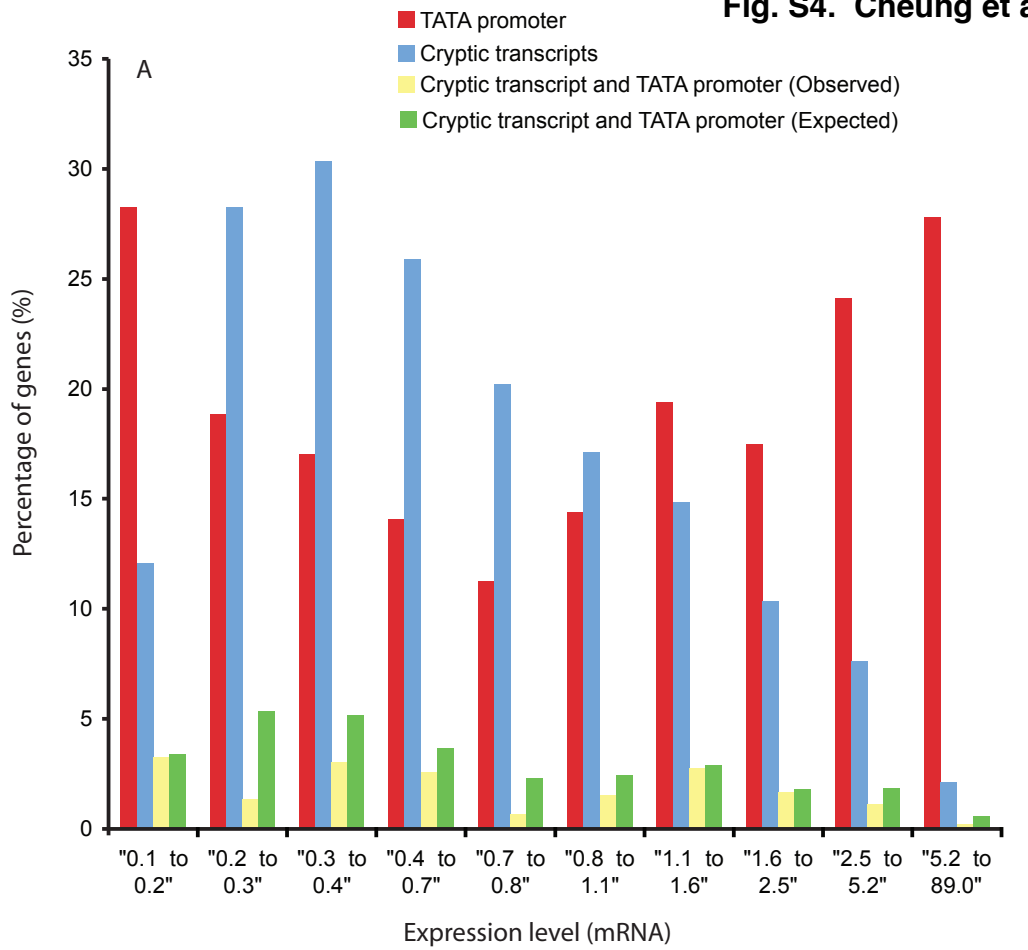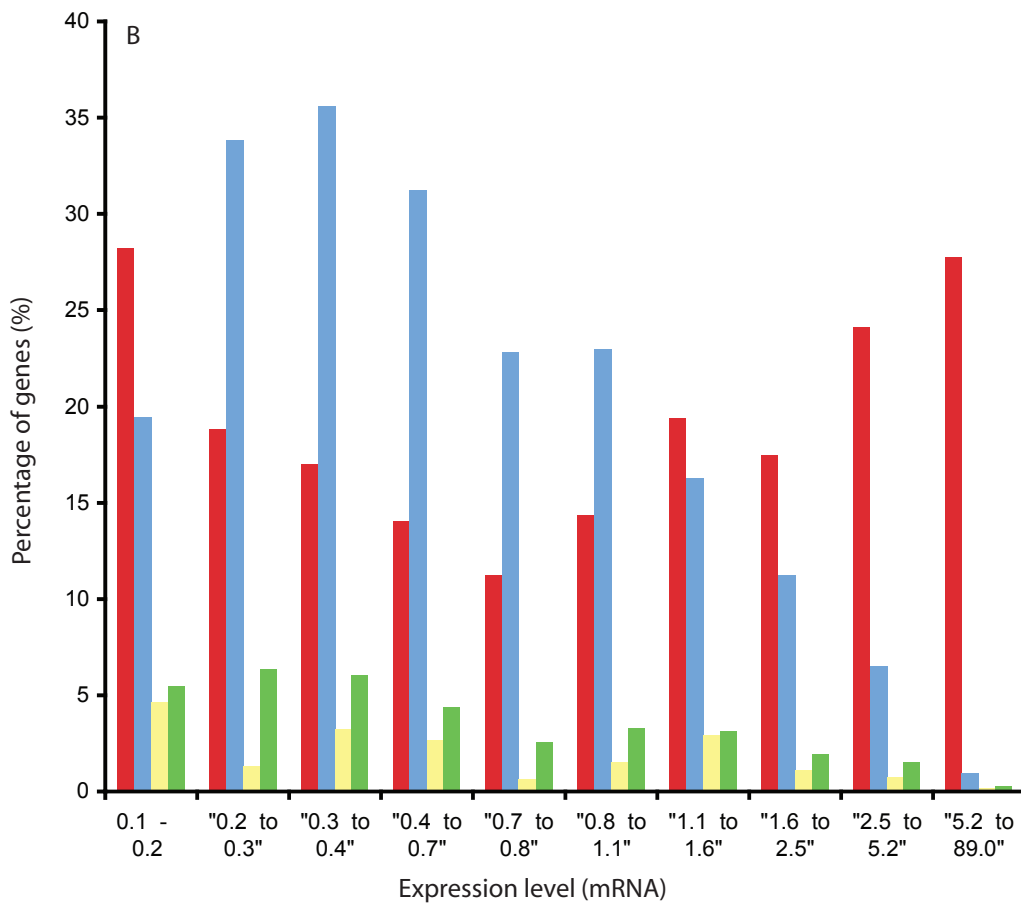

Supplement: pbio.0060277.sg004.pdf [file pbio.0060277.sg004.pdf]

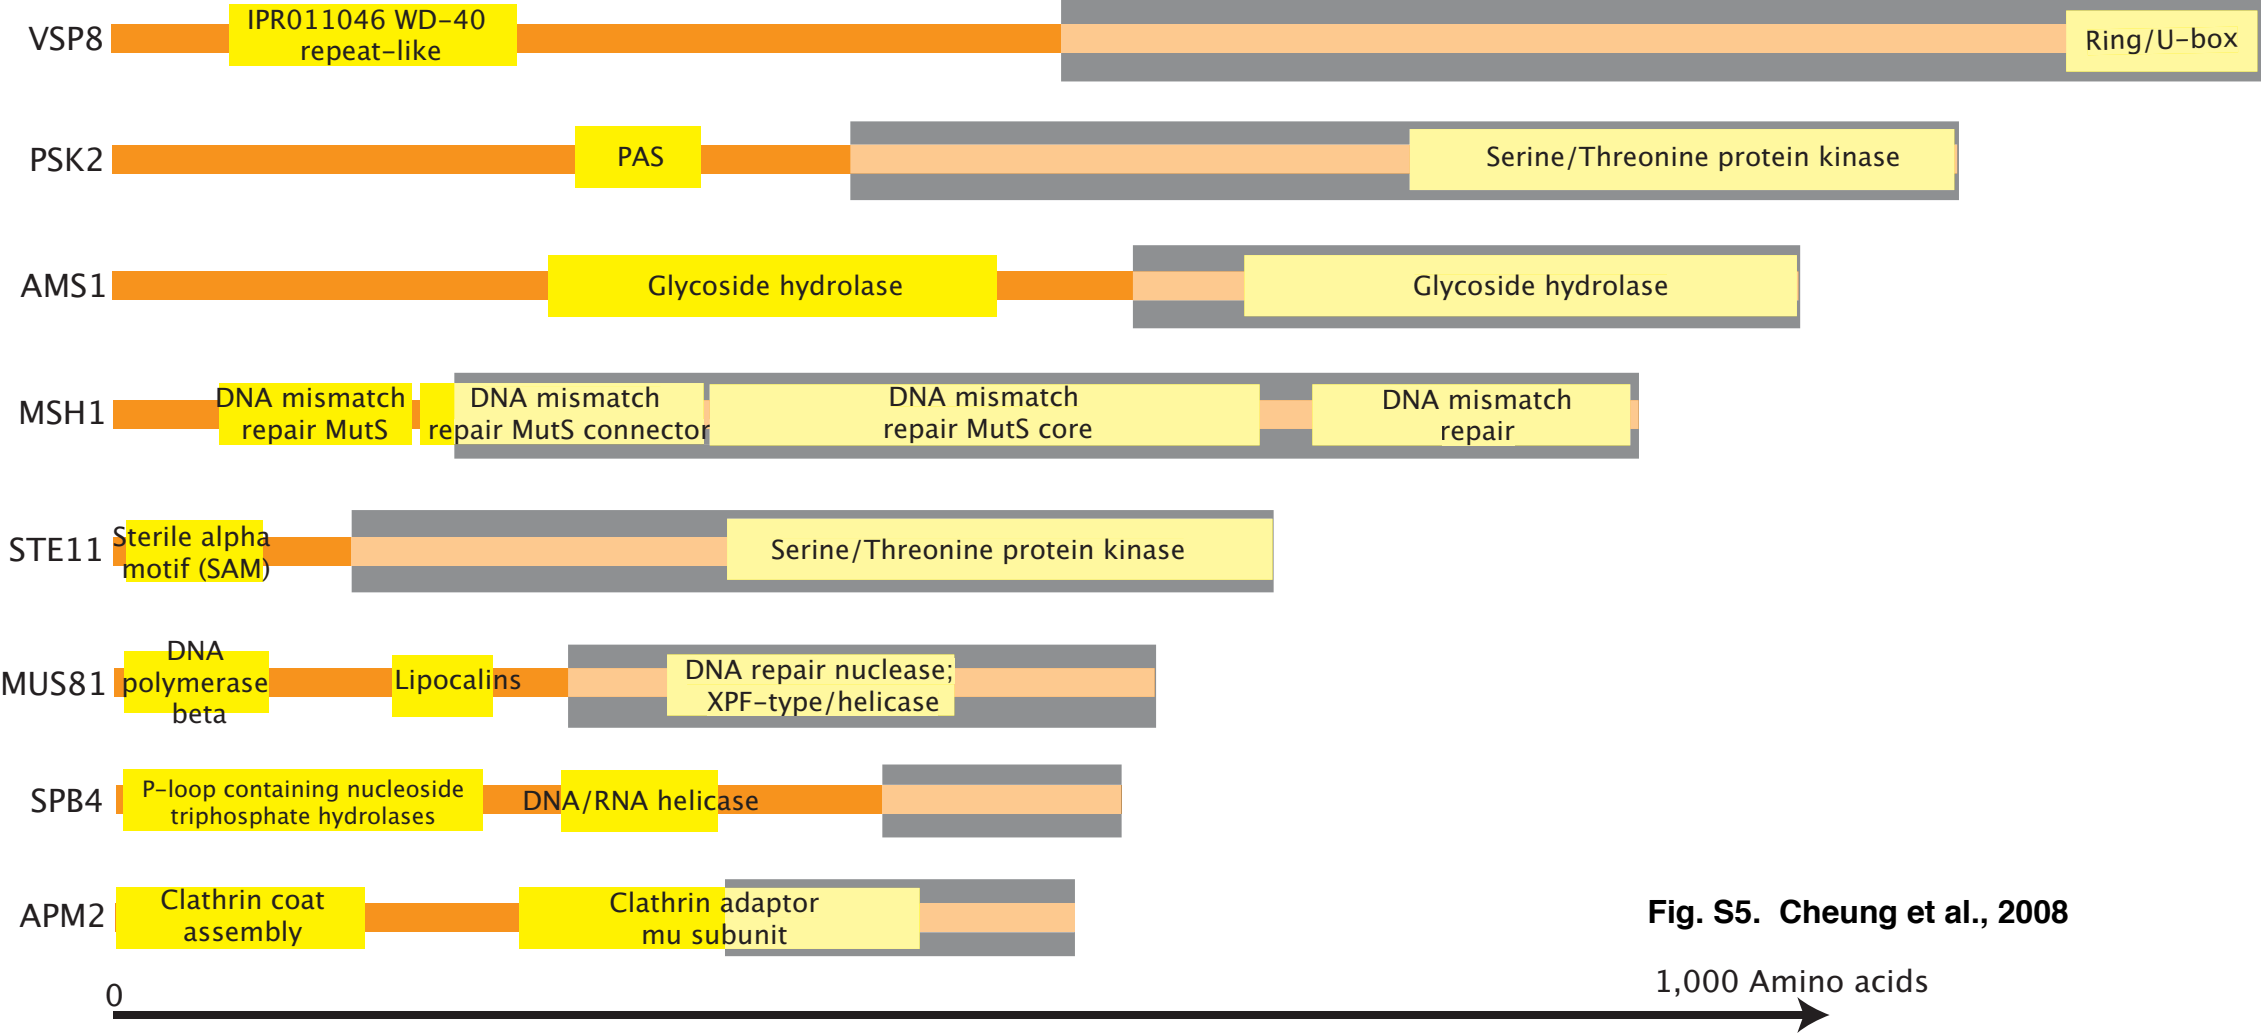

**Fig. S5. Cheung et al., 2008**

Supplement: pbio.0060277.sg005.pdf [file pbio.0060277.sg005.pdf]
